Nephrol Dial Transplant (2000) 15: 1738–1742

## Managing phosphate retention: is a change necessary?

Isidro B. Salusky<sup>1</sup> and William G. Goodman<sup>2</sup>

<sup>1</sup>Department of Pediatrics and <sup>2</sup>Department of Medicine, UCLA School of Medicine, Los Angeles, California, USA

### Introduction

Cardiovascular disease accounts for half the deaths in adults treated with maintenance dialysis, and mortality from cardiovascular causes is far higher than that in the general population [1,2]. Contributing factors include sodium and water overload, hypertension, diabetes mellitus, alterations in lipid metabolism and elevated levels of homocysteine in serum [3–8]. Despite considerable progress over the last two decades in the management of these and other traditional cardiovascular risks, the mortality rate from cardiovascular causes has not diminished in patients with end-stage renal disease (ESRD) [9]. Indeed, cardiovascular mortality for those treated with dialysis continues to far exceed that predicted from the combined risks attributable to age, sex, systolic blood pressure, left ventricular hypertrophy, serum total and HDL cholesterol, cigarette smoking and diabetes mellitus [10]. Other factors

are likely, therefore, to account for the high incidence of cardiovascular death in those undergoing long-term dialysis.

### Disturbances of calcium and phosphate metabolism and cardiovascular morbidity

Evidence is accumulating that disturbances in mineral metabolism contribute to the development of cardiovascular disease and to overall mortality in patients with ESRD [11–15]. Block *et al.* reported that elevated serum phosphorus levels were an independent risk factor for death in adults undergoing dialysis even after adjusting for established cardiovascular risks and other co-morbid conditions [11]. The mechanisms that underlie this association remain uncertain, but hyperphosphataemia has long been recognized as an important determinant of soft tissue and vascular calcification in patients with chronic renal failure. Several recent studies suggest that vascular calcification, due at least in part to hyperphosphataemia and/or the measures used to manage phosphate retention, represents one

*Correspondence and offprint requests to:* Isidro B. Salusky, M.D., Department of Pediatrics, UCLA Medical Center, A2-331, MDCC, 10833 Le Conte Ave, Los Angeles, CA 90095, USA.

pathway by which alterations in mineral metabolism can adversely affect clinical outcomes both in adult and in paediatric patients with ESRD [12–14,16,17].

### Soft-tissue calcifications in patients with renal failure

Vascular calcification in patients with chronic renal failure was first described by Virchow [18]. The overall prevalence of the disorder is not known, but Tatler *et al.* found that 27% of patients with advanced renal disease had evidence of vascular calcification when treatment with dialysis was first begun [19]. The percentage of those with evidence of vascular calcification rose to 80% after 9 years of maintenance dialysis therapy [19]. Others have reported that vascular calcifications are present in 20–55% of the general dialysis population. Calcification of the myocardium and cardiac valves also occurs in patients with ESRD [20]. Together, these abnormalities are likely to contribute to myocardial ischaemia, impaired myocardial function, cardiac valve insufficiency and cardiac arrhythmia in patients undergoing long-term dialysis.

### Calcification of atherosclerotic plaques

Arterial calcification is an integral component of atherosclerosis, and 80–90% of advanced atherosclerotic vascular lesions contain calcium [21]. The presence of calcium within atherosclerotic plaques may be a particularly important determinant of plaque fragility, leading to plaque rupture and thrombosis. Although the relationship between vascular calcification and the atherosclerotic process is not fully understood, certain factors that are integrally involved in mineral metabolism are known to influence the process of arterial wall calcification [22–25].

Calcium deposits in atherosclerotic plaques can contain hydroxyapatite, which represents the crystal phase of calcium and phosphorus in fully mineralized bone. In some cases, advanced atherosclerotic lesions have fully formed bone elements within them, including trabeculae, lacunae and areas resembling marrow spaces. Potential mediators of bone formation within the arterial wall included developmental retention of pluripotent cells or osteoblastic immigration with loss of regulatory control [23,26]. Studies using *in situ* hybridization in calcified human atherosclerotic lesions have demonstrated expression of the bone-related proteins osteopontin and bone morphogenic protein type 2 (BMP-2) [23,27]. It has also been shown that smooth muscle cells can calcify under certain *in vitro* cell culture conditions [28], and vitamin D has been suggested to play a role in the development of vascular calcifications [29].

Despite these findings, the relationship between arterial calcification in chronic renal failure and the process of calcification within atherosclerotic lesion remains uncertain. It is possible that the abnormalities

of mineral metabolism that result from chronic renal failure aggravate the deposition of calcium and phosphorus within existing atherosclerotic plaques. Alternatively, the two processes may be distinct and unrelated to one another. Considerable additional work is required to resolve this matter.

### Arterial calcifications in dialysis patients and the role of oral calcium intake

In a recent issue of *Nephrology, Dialysis and Transplantation*, Guerin *et al.* provided additional evidence implicating certain components of the clinical management of patients with ESRD in the development of cardiovascular pathology [14]. These investigators used B-mode ultrasonography to measure wall stiffness in the common carotid artery, in the femoral artery and in the aorta of patients treated with haemodialysis. They found that wall stiffness was directly related to the presence and extent of arterial calcification. Factors associated with increases in arterial wall rigidity were age, duration of dialysis, serum fibrinogen levels and the prescribed dose of calcium that was used as a phosphate-binding agent [14]. In the present issue of this journal, Eifinger and colleagues reported evidence of coronary artery calcification as determined by electron beam computed tomography (EBCT) in children and young adults who were treated with maintenance dialysis. Such findings, together with other recently presented data [13], extend to younger persons the observations made originally by Braun *et al.* who noted that 65% of adult haemodialysis patients between the ages of 29 and 72 years had EBCT evidence of coronary artery calcification [30]. The results of three independent studies demonstrate that the extent of coronary calcification is substantially greater in patients with ESRD than that observed in patients of the same age and gender in the general population, including those with angiographically documented coronary artery disease [13,30,31].

The observations by Guerin and co-workers [14] and by Eifinger *et al.* are consistent with data reported recently by Goodman and colleagues in young adults treated with dialysis [13]. Nearly 90% of patients between the ages of 20 and 30 had EBCT evidence of coronary artery calcification [13]. In contrast, only three of 60 volunteers of the same age with normal renal function had any coronary artery calcification that was detectable by EBCT [13]. Patients with positive scans were older, and they had been treated with dialysis for much longer than those with negative scans. As such, the proportion of young adults with coronary artery calcification increased as a function of the duration of treatment with dialysis [13]. Coronary artery calcification scores nearly doubled when EBCT were repeated 18–24 months later.

Compared with those without EBCT evidence of coronary artery calcification, young adult with positive EBCT scans had higher serum phosphorus levels and higher values for the calcium–phosphorus ion product

in serum. Both factors have previously been implicated in the development of cardiac valve calcification in older adults with ESRD [20]. Perhaps more important, however, was the finding that young adult dialysis patients with coronary artery calcification were ingesting nearly twice as much calcium in the form of calcium-containing, phosphate-binding agents than those without detectable calcium deposits [13]. Together with the recent observations of Guerin and co-workers [14], the results suggest that the most widely used method for controlling serum phosphorus levels in patients undergoing dialysis can aggravate cardiovascular disease as manifested by arterial calcification and diminished arterial wall compliance. It is quite possible, therefore, that protracted exposure to large oral doses of calcium in patients with little or no residual renal function, particularly those with persistently high serum phosphorus levels, can lead to the development of coronary artery calcification even in younger patients who do not harbour traditional cardiovascular risks.

### Importance of controlling phosphate retention

The use of phosphate-binding agent is unavoidable in nearly all patients with ESRD [32,33]. Dietary phosphate restriction alone is only moderately effective in controlling serum phosphorus levels, and further decreases in dietary phosphorus content compromise overall nutrition, particularly protein intake [34]. Phosphate removal during dialysis is limited largely due to the intracellular location of most inorganic phosphorus. The amounts removed either by thrice-weekly haemodialysis, ~800 mg/treatment or 2400 mg/week, or by daily peritoneal dialysis, 300–400 mg/treatment or 2100–2800 mg/week, are far less than that ingested by most patients, 800–1200 mg/day or 5600–9600 mg/week [35]. The inadequacy of current haemodialysis regimens for controlling serum phosphorus levels is underscored by the finding that patients treated with daily nocturnal haemodialysis have normal serum phosphorus levels and often do not require oral phosphate-binding medications [36].

### The use of phosphate-binding agents

During the first two decades of treatment with maintenance dialysis in patients with end-stage renal disease, aluminium-containing compounds were used predominantly as phosphate-binding agents. Subsequently, the use of these compounds was associated with the development of aluminium toxicity because patients with renal failure cannot excrete aluminium that is absorbed from the gastrointestinal tract [37,38]. As a result, calcium-containing compounds have been widely used for the past decade as phosphate-binding agents both in adults and in children undergoing regular dialysis [39–42]. Unfortunately, quite large oral doses of cal-

cium are needed to effectively diminish intestinal phosphorus absorption. Indeed, the doses required far exceed the 1500 mg of elemental calcium that is recommended for persons with normal renal function to prevent age-related bone loss [43,44]. Calcium intake in dialysis patients often ranges from 5 to 8 g per day [39–41]. A portion of the calcium ingested is absorbed via the passive vitamin D-independent pathway, which increases directly as a function of the amount of ingested [45]. The concurrent administration of 1,25-dihydroxyvitamin D or other vitamin D sterol further increases the risk of developing hypercalcaemia and/or hyperphosphataemia [46,47].

### Potential value of new aluminium- and calcium-free phosphate binding agents and vitamin D derivatives

In this context, alternative methods for managing hyperphosphataemia in patients undergoing long-term dialysis that do not entail the use of very large oral doses of calcium should be implemented. Dietary calcium intake should be maintained at levels that are sufficient to satisfy daily requirements, but the use administration of additional calcium as calcium-containing phosphate-binding agents should be avoided.

The new phosphate-binding agent, sevelamer (Renagel®), approved by the Food and Drug Administration (FDA) in the United States, is an ion exchange resin that binds phosphorus in the intestinal lumen and prevents its absorption. It does not contain either calcium or aluminium, and it has been shown to be effective in managing phosphate retention both in short-term and long-term studies of patients undergoing haemodialysis [48–51]. The cholesterol lowering properties of this compound also make it an appealing therapeutic alternative for use in a subgroup of patients who are known to be at risk for developing cardiovascular disease [52].

In addition to sevelamer, there are other iron-containing compounds in different phases of drug development, such as stabilized polynuclear iron hydroxide and ferric polymaltose complex, have been shown to be effective in controlling serum phosphorus levels in short-term studies in adults and rats with chronic renal failure [53,54]. Another agent, lanthanum chloride hydrate, also decreases intestinal phosphorus absorption in experimental animals, and clinical trials using this compound are currently underway [55].

When the treatment of secondary hyperparathyroidism with vitamin D sterols is necessary, the use of new vitamin D analogues that putatively have less of an effect in raising serum calcium and phosphorus levels should be considered to diminish the chances of developing hypercalcaemia and/or hyperphosphataemia. These are often complications of calcitriol therapy, and their occurrence limits the dose of calcitriol that can be safely given [47]. The new vitamin D analogues that are available for clinical use in the United States

include 19-nor-1,25-dihydroxyvitamin D<sub>2</sub> or paricalcitol, and 1-alpha-hydroxyvitamin D<sub>2</sub> or doxercalciferol. Both compounds have been shown to effectively lower serum PTH levels with only modest changes in serum calcium and/or phosphorus levels in haemodialysis patients with secondary hyperparathyroidism [56,57]. The frequency of episodes of hypercalcaemia and hyperphosphataemia during treatment with these agents has not, however, been directly compared with that observed during treatment with calcitriol. Such information is needed to determine whether the use of paricalcitol or doxercalciferol provide safe alternatives to calcitriol for controlling excess PTH secretion in patients with ESRD.

Whether the more stringent control of serum phosphorus levels and the avoidance of hypercalcaemia using recently developed therapeutic strategies, as recently advocated by Block *et al.*, will favourably affect the development and progression of vascular calcification and cardiovascular disease in the ESRD population remains to be determined [58]. Evidence is accumulating, however, to prove that phosphate retention and/or the conventional therapeutic interventions aimed at managing this consequence of chronic renal failure can aggravate soft tissue and vascular calcifications [13,14]. As such, maintaining serum calcium and phosphorus levels, and values for the calcium-phosphorus ion product in serum, within the ranges seen in persons with normal renal function rather than at the higher levels previously considered to be acceptable in those with chronic renal failure seem prudent. There is less available information about the suitable target range for values of serum PTH that diminishes or minimizes the risks of soft tissue and vascular calcification. The continued high risk of cardiovascular death in patients with ESRD demands that serious consideration be given to fundamental changes in the clinical management of abnormalities in bone and mineral metabolism in such patients, particularly when certain aspects of treatment have been implicated as contributors to vascular calcification and overall in adult patient mortality. Such factors should also be considered in the management of paediatric patients with end-stage renal disease [16].

*Acknowledgements.* This work was supported in part by USPHS grants DK-35423, DK-52095 and RR-00865, and by funds from the Casey Lee Ball Foundation.

## References

1. Causes of death. *U.S. Renal Data System, USRDS 1998 Annual Data Report*. The National Institute of Health, National Institute of Diabetes and Digestive and Kidney Diseases, Bethesda, MD. 1999: 79–90
2. Patient mortality and survival. *U.S. Renal Data System, USRDS 1998 Annual Data Report*. The National Institute of Health, National Institute of Diabetes and Digestive and Kidney Diseases, Bethesda, MD. 1999: 63–78
3. Mailloux LU, Haley WE. Hypertension in the ESRD patient: pathophysiology, therapy, outcomes, and future directions. *Am J Kidney Dis* 1998; 32: 705–719
4. Zager PG, Nikolic J, Brown RH *et al.* “U” curve association of blood pressure and mortality in hemodialysis patients. Medical Directors of Dialysis Clinic, Inc. *Kidney Int* 1998; 54: 561–569
5. Owen WF, Madore F, Brenner BM. An observational study of cardiovascular characteristics of long-term end-stage renal disease survivors. *Am J Kidney Dis* 1996; 28: 931–936
6. DeFronzo RA. Pathogenesis of glucose intolerance in uremia. *Metabolism* 1978; 27: 1866–1880
7. Avram MM, Goldwasser P, Burrell DE *et al.* The uremic dyslipidemia: a cross-sectional and longitudinal study. *Am J Kidney Dis* 1992; 20: 324–335
8. Bostom AG, Shemin D, Lapane KL *et al.* Hyperhomocysteinemia, hyperfibrinogenemia, and lipoprotein (a) excess in maintenance dialysis patients: a matched case-control study. *Atherosclerosis* 1996; 125: 91–101
9. Lindner A, Charra B, Sherrard DJ, Scribner BH. Accelerated atherosclerosis in prolonged maintenance haemodialysis. *N Engl J Med* 1974; 290: 697–701
10. Zoccali C. Cardiovascular risk in uraemic patients—is it fully explained by classical risk factors? *Nephrol Dial Transplant* 2000; 15: 454–457
11. Block GA, Hulbert-Shearon TE, Levin NW, Port FK. Association of serum phosphorus and calcium × phosphorus product with mortality risk in chronic haemodialysis patients: a national study. *Am J Kidney Dis* 1998; 31: 607–617
12. Ribeiro S, Ramos A, Brandao A *et al.* Cardiac valve calcification in haemodialysis patients: role of calcium-phosphate metabolism. *Nephrol Dial Transplant* 1998; 13: 2037–2040
13. Goodman WG, Goldin J, Kuizon BD *et al.* Coronary artery calcification in young adults with end-stage renal disease who are undergoing dialysis. *N Engl J Med* 2000; 342: 1478–1483
14. Guérin AP, London GM, Marchais SJ, Metivier F. Arterial stiffening and vascular calcifications in end-stage renal disease. *Nephrol Dial Transplant* 2000; 15: 1014–1021
15. Drüeke T. A clinical approach to the uraemic patient with extraskeletal calcifications. *Nephrol Dial Transplant* 1996; 11: 37–42
16. Milliner DS, Zinsmeister AR, Lieberman E, Landing B. Soft tissue calcification in pediatric patients with end-stage renal disease. *Kidney Int* 1990; 38: 931–936
17. Savage T, Clarke AL, Giles M, Tomson CRV, Raine AEG. Calcified plaque is common in the carotid and femoral arteries of dialysis patients without clinical vascular disease. *Nephrol Dial Transplant* 1998; 13: 2004–2012
18. Virchow R. Kalk metastasen. *Virchow's Arch Pathol Anat* 1855; 8: 103–113
19. Tatler GLV, Baillod RA, Varghese Z *et al.* Evolution of bone disease over 10 years in 135 patients with terminal renal failure. *Br Med J* 1973; 4: 315–319
20. Rostand SG, Sanders C, Kirk KA, Rutsky EA, Fraser RG. Myocardial calcification and cardiac dysfunction in chronic renal failure. *Am J Med* 1988; 85: 651–657
21. Schwarz U, Buzello M, Ritz E *et al.* Morphology of coronary atherosclerotic lesions in patients with end-stage renal failure. *Nephrol Dial Transplant* 2000; 15: 218–223
22. Berliner JA, Navab M, Fogelman AM *et al.* Atherosclerosis: basic mechanisms. Oxidation, inflammation, and genetics. *Circulation* 1995; 91: 2488–2496
23. Bostrom K, Watson KE, Horn S *et al.* Bone morphogenetic protein expression in human atherosclerotic lesions. *J Clin Invest* 1993; 91: 1800–1809
24. Watson KE, Bostrom K, Ravindranath R *et al.* TGF-beta 1 and 25-hydroxycholesterol stimulate osteoblast-like vascular cells to calcify. *J Clin Invest* 1994; 93: 2106–2113
25. Doherty TM, Tang W, Dascalos S *et al.* Ethnic origin and serum levels of 1,25-dihydroxyvitamin D<sub>3</sub> are independent predictors of coronary calcium mass measured by electron-beam computed tomography. *Circulation* 1997; 96: 1477–1481
26. Bostrom K, Watson KE, Stanford WP, Demer LL. Atherosclerotic calcification: relation to developmental osteogenesis. *Am J Cardiol* 1995; 75: 88B–91B



27. Fitzpatrick LA, Severson A, Edwards WD, Ingram RT. Diffuse calcification in human coronary arteries. Association of osteopontin with atherosclerosis. *J Clin Invest* 1994; 94: 1597–1604
28. Qiao JH, Xie PZ, Fishbein MC *et al.* Pathology of atheromatous lesions in inbred and genetically engineered mice. Genetic determination of arterial calcification. *Arterioscler Thromb* 1994; 14: 1480–1497
29. Watson KE, Abrolat ML, Malone LL *et al.* Active serum vitamin D levels are inversely correlated with coronary calcification. *Circulation* 1997; 96: 1755–1760
30. Braun J, Oldendorf M, Moshage W *et al.* Electron beam computed tomography in the evaluation of cardiac calcifications in chronic dialysis patients. *Am J Kidney Dis* 1996; 27: 394–401
31. Detrano R, Hsiai T, Wang S, Puentes G, *et al.* Prognostic significance of coronary calcifications in patients undergoing coronary angiography: a multicenter study. *J Am Coll Cardiol* 1996; 27: 285–290
32. Slatopolsky E, Caglar S, Gradowska L *et al.* On the prevention of secondary hyperparathyroidism in experimental chronic renal disease using “proportional reduction” of dietary phosphorus intake. *Kidney Int* 1972; 2: 147–151
33. Goodman WG, Coburn JW, Slatopolsky E, Salusky IB. Renal osteodystrophy in adults and children. In: Favus MJ, ed. *Primer on the Metabolic Bone Diseases and Disorders of Mineral Metabolism*. Lippincott, Williams and Wilkins, Philadelphia, 1999: 347–363
34. Kopple JD, Coburn JW. Metabolic studies of low protein diets in uremia: II. Calcium, phosphorus and magnesium. *Medicine* 1973; 52: 597–607
35. Hsu CH. Are we mismanaging calcium and phosphate metabolism in renal failure? *Am J Kidney Dis* 1997; 29: 641–649
36. Mucsi I, Hercz G, Uldall R *et al.* Control of serum phosphorus without any phosphate binders in patients treated with nocturnal haemodialysis. *Kidney Int* 1998; 53: 1399–1404
37. Salusky IB, Foley J, Nelson P, Goodman WG. Aluminum accumulation during treatment with aluminum hydroxide and dialysis in children and young adults with chronic renal disease. *N Engl J Med* 1991; 324: 527–531
38. Andreoli SP, Bergstein JM, Sherrard DJ. Aluminum intoxication from aluminum-containing phosphate binders in children with azotemia not undergoing dialysis. *N Engl J Med* 1984; 310: 1079–1084
39. Salusky IB, Coburn JW, Foley J, Nelson P, Fine RN. Effects of oral calcium carbonate on control of serum phosphorus and changes in plasma aluminum levels after discontinuation of aluminum-containing gels in children receiving dialysis. *J Pediatr* 1986; 108: 767–770
40. Fournier A, Moriniere PH, Sebert JL *et al.* Calcium carbonate, an aluminum-free agent for control of hyperphosphatemia, hypocalcemia and hyperparathyroidism in uremia. *Kidney Int* 1986; 29: S115–S119
41. Slatopolsky E, Weerts C, Lopez-Hilker S *et al.* Calcium carbonate is an effective phosphate binder in patients with chronic renal failure undergoing dialysis. *N Engl J Med* 1986; 315: 157–161
42. Cunningham J, Beer J, Coldwell RD *et al.* Dialysate calcium reduction in CAPD patients treated with calcium carbonate and alfa-calcidol. *Dialysis Transplant Nephrol* 1992; 7: 63–68
43. Osteoporosis Consensus Panel. Osteoporosis. *JAMA* 1984; 252: 799–802
44. Optimal Calcium Intake. *NIH Consensus Statement* 1994; 12: 1–31
45. Harvey JA, Zobitz MM, Pak CYC. Dose dependency of calcium absorption: A comparison of calcium carbonate and calcium citrate. *J Bone Miner Res* 1988; 3: 253–258
46. Schaefer K, Scheer J, Asmus G *et al.* The treatment uraemic hyperphosphataemia with calcium acetate and calcium carbonate: A comparative study. *Nephrol Dial Transplant* 1991; 6: 171–175
47. Coburn JW, Salusky IB, Norris KC, Goodman WG. Oral and parenteral calcitriol for the management of end-stage renal disease. *Contrib Nephrol* 1991; 90: 166–182
48. Burke TJ, Slatopolsky EA, Goldberg DL. RenaGel, a novel calcium- and aluminum-free phosphate binder, inhibits phosphate absorption in normal volunteers. *Nephrol Dial Transplant* 1997; 12: 1640–1644
49. Chertow GM, Burke SK, Lazarus JM *et al.* Poly[allylamine hydrochloride] (RenaGel): a noncalcemic phosphate binder for the treatment of hyperphosphatemia in chronic renal failure. *Am J Kidney Dis* 1997; 29: 66–71
50. Slatopolsky EA, Burke SK, Dillon MA. RenaGel, a nonabsorbed calcium- and aluminum-free phosphate binder, lowers serum phosphorus and parathyroid hormone. The RenaGel Study Group. *Kidney Int* 1999; 55: 299–307
51. Chertow GM, Dillon M, Burke SK *et al.* A randomized trial of sevelamer hydrochloride (RenaGel) with and without supplemental calcium. Strategies for the control of hyperphosphatemia and hyperparathyroidism in haemodialysis patients. *Clin Nephrol* 1999; 51: 18–26
52. Chertow GM, Burke SK, Dillon MA, Slatopolsky E. Long-term effects of sevelamer hydrochloride on the calcium  $\times$  phosphate product and lipid profile of haemodialysis patients. *Nephrol Dial Transplant* 1999; 14: 2709–2714
53. Hergesell O, Ritz E. Stabilized polynuclear iron hydroxide is an efficient oral phosphate binder in uraemic patients. *Nephrol Dial Transplant* 1999; 14: 863–867
54. Hsu CH, Patel SR, Young EW. New phosphate binding agents: Ferric compounds. *J Am Soc Nephrol* 1999; 10: 1274–1280
55. Hutchison AJ. Calcitriol, lanthanum carbonate, and other new phosphate binders in the management of renal osteodystrophy. *Perit Dial Int* 1999; 19 [Suppl 2]: S408–S412
56. Martin KJ, Gonzalez EA, Gellens M *et al.* 19-Nor-1- $\alpha$ -25-dihydroxyvitamin D2 (paricalcitol) safely and effectively reduces the levels of intact parathyroid hormone in patients on haemodialysis. *J Am Soc Nephrol* 1998; 9: 1427–1432
57. Frazao JM, Elangovan L, Chesney RW *et al.* One-alpha-hydroxyvitamin D2 (doxercalciferol) effectively and safely suppresses intact parathyroid hormone levels in haemodialysis patients with moderate to severe secondary hyperparathyroidism: Results of a multicenter double-blinded, placebo-controlled study. *Am J Kidney Dis*. In press 2000
58. Block GA, Port FK. Re-evaluation of risks associated with hyperphosphatemia and hyperparathyroidism in dialysis patients: recommendations for a change in management. *Am J Kidney Dis* 2000; 35: 1226–1237

### Editor's note

Please see also Letter to the Editor by F. Eifinger *et al.* pp. 1892–1894.
